# Supplementary material for: Porous pillar[6]arene-based polymers for reversible iodine capture
Source: Royal Society of Chemistry journal article supplement (doi:10.1039/d4na00667d), 2024-01-01
Supplement: d4na00667d1.pdf [file d4na00667d1.pdf]

**Supporting Information**  
**for**  
**Porous Pillar[6]arene-Based Polymers for Reversible Iodine Capture**

Shujie Lin, Ziliang Zhang, Di Gao, Longming Chen, Chengyang Tian, Junyi Chen,\*  
Qingbin Meng\*

State Key Laboratory of National Security Specially Needed Medicines, Beijing  
Institute of Pharmacology and Toxicology, Beijing 100850, P. R. China.

## Table of Contents

|                                                                          |            |
|--------------------------------------------------------------------------|------------|
| <b>1 General materials and methods</b>                                   | <b>S3</b>  |
| 1.1 Materials                                                            | S3         |
| 1.2 Instruments                                                          | S3         |
| 1.3 Iodine capture experiments in aqueous solution                       | S3         |
| 1.4 Iodine capture experiments in n-hexane                               | S4         |
| 1.5 Iodine vapor uptake experiments                                      | S4         |
| 1.6 Regeneration and recycling experiments                               | S5         |
| <b>2 Synthetic procedures</b>                                            | <b>S6</b>  |
| <b>3 Supporting results and experimental raw data</b>                    | <b>S7</b>  |
| 3.1 FT-IR spectra of M-OH and MPs                                        | S7         |
| 3.2 Gas adsorption and porosity measurements                             | S8         |
| 3.3 Calibration curve of iodine in aqueous solution for adsorption study | S10        |
| 3.4 Iodine capture speed monitoring in aqueous solution                  | S11        |
| 3.5 Selective adsorption experiments                                     | S15        |
| 3.6 Comparison of adsorption capacity                                    | S16        |
| 3.7 Calibration curve of iodine in n-hexane for adsorption study         | S17        |
| 3.8 Iodine capture speed monitoring in n-hexane                          | S18        |
| 3.9 PXRD patterns of iodine and I <sub>2</sub> @P-P6APs                  | S22        |
| 3.10 FT-IR spectra of P-P6APs and I <sub>2</sub> @P-P6APs                | S23        |
| 3.11 The sixth recycling experiments                                     | S24        |
| <b>References</b>                                                        | <b>S25</b> |

## 1 General materials and methods

### 1.1 Materials

All the reagents and solvents were commercially available and used as received unless other specified purification. Perhydroxylated pillar[6]arene (P6A-OH) was synthesized according to a literature method.<sup>1</sup> Hydroquinone (M-OH), decafluorobiphenyl (DFB) and iodine (I<sub>2</sub>) were purchased from Innochem (Beijing, China). Potassium iodide (KI), n-hexane, potassium carbonate (K<sub>2</sub>CO<sub>3</sub>), N,N-dimethylformamide (DMF) and methanol (MeOH) were purchased from Sinopharm Chemical Reagent Beijing. Activated carbon (AC) was purchased from Henan Xingnuo Environmental Protection Material Co.,Ltd.

### 1.2 Instruments

Ultraviolet-visible (UV/vis) spectroscopy was performed on a Cary 300 Agilent UV/vis spectrometer. The morphology was imaged by scanning electron microscopy (SEM, Hitachi Regulus SU8010, operated at 5 kV). Fourier transform infrared spectroscopy (FT-IR) spectra was recorded on a JOSVOK FTIR-1500 spectrometer. The surface area and pore size distribution analysis of polymers were performed on a Quantachrome Autosorb-iQ gas adsorption and pore size analyzer, using N<sub>2</sub> adsorption and desorption at 77.3 K. Samples were degassed at 80 °C under high vacuum for 24 h prior to the N<sub>2</sub> adsorption and desorption analysis. Powder X-ray diffraction (PXRD) analysis was performed in X-ray powder diffractometer (Rigaku Ultima IV).

### 1.3 Iodine capture experiments in aqueous solution

In order to monitor the iodine capture of P-P6APs in aqueous solution, a time-dependent UV/vis measurement was carried out. AC and MPs were set up as positive and negative controls, separately. Firstly, prepare 100,000 ppm I<sub>2</sub>/KI aqueous (1g KI and 1 g I<sub>2</sub> in 10 mL H<sub>2</sub>O) and dilute it to 250 ppm I<sub>2</sub>/KI<sub>(aq)</sub>. Then, P-P6APs (6.0 mg), AC (6.0 mg) and MPs (6.0 mg) were added respectively to an 250 ppm I<sub>2</sub>/KI<sub>(aq)</sub> (6 mL) with shaking. The UV/vis spectrum of the solution was recorded over time.

The I<sub>2</sub>/KI<sub>(aq)</sub> concentration was determined with UV/vis spectroscopy according

to a standard curve.

The I<sub>2</sub> uptake efficiency was calculated with the following equation:

$$\text{I}_2 \text{ uptake efficiency} = \frac{(C_0 - C_t)}{C_0} \times 100\%$$

C<sub>0</sub> (ppm) is the concentration of I<sub>2</sub>/KI<sub>(aq)</sub> before uptake and C<sub>t</sub> (ppm) is the concentration of I<sub>2</sub>/KI<sub>(aq)</sub> at various time after adding adsorbent materials.

#### 1.4 Iodine capture experiments in n-hexane

To further explore whether P-P6APs is also possible to capture iodine from organic solution, a UV/vis measurement based on iodine/n-hexane solution was carried out. In the same way, AC and MPs were set up as positive and negative controls, separately. P-P6APs (24.0 mg), AC (24.0 mg) and MPs (24.0 mg) were added respectively to an iodine/n-hexane solution (1.0 mM, 6 mL) with shaking. The UV/vis spectrum of the solution was recorded over time.

The concentration of iodine/n-hexane solution was determined with UV/vis spectroscopy according to a standard curve.

The I<sub>2</sub> uptake efficiency was calculated with the following equation:

$$\text{I}_2 \text{ uptake efficiency} = \frac{(C_0 - C_t)}{C_0} \times 100\%$$

C<sub>0</sub> (mM) is the concentration of iodine/n-hexane solution before uptake and C<sub>t</sub> (mM) is the concentration of iodine/n-hexane solution at various time after adding adsorbent materials.

#### 1.5 Iodine vapor uptake experiments

To examine the uptake ability of P-P6APs for iodine vapor, time-dependent iodine vapor uptake experiments based on gravimetric measurements were performed in the following procedure: Similarly, AC and MPs were set up as positive and negative controls, separately. 15 mg of adsorbent materials, namely, P-P6APs, AC and MPs were taken in a preweighed glass vessel (2 mL). And then the glass vessel containing samples was transferred in bigger sealed glass vial (20 mL). 500 mg molecular iodine was placed in bigger glass vial maintaining no physical contact between iodine and adsorbent materials. Next, the closed container was heated at 80 °C in bake oven. After iodine vapor adsorption over time, the iodine-loaded adsorbent

materials were cooled down to room temperature and weighted. The iodine uptake capacities for adsorbent materials were calculated by weight gains:

$$\text{I}_2 \text{ uptake efficiency} = \frac{(W_a - W_b)}{W_b} \times 100\text{wt}\%$$

$W_a$  is the mass weight of adsorbent materials before iodine vapor adsorption and  $W_b$  is the mass weight of adsorbent materials after iodine vapor adsorption at various time.

## **1.6 Regeneration and recycling experiments**

$\text{I}_2$ @P-P6APs were immersed in MeOH (2mL) for desorption of the iodine/iodide, during which the solvent was decanted and washing repeatedly several times. After complete release (no color change happened when the samples were immersed in MeOH), the resultant samples were desolvated under vacuum at 100 °C over 4 h to achieve regeneration and the regenerated samples were used for the next cycle under the same adsorption conditions. Repeat 5 regenerative cycles and calculate  $\text{I}_2$  adsorption efficiency to appraise the recyclability of P-P6APs.

## 2 Synthetic procedures

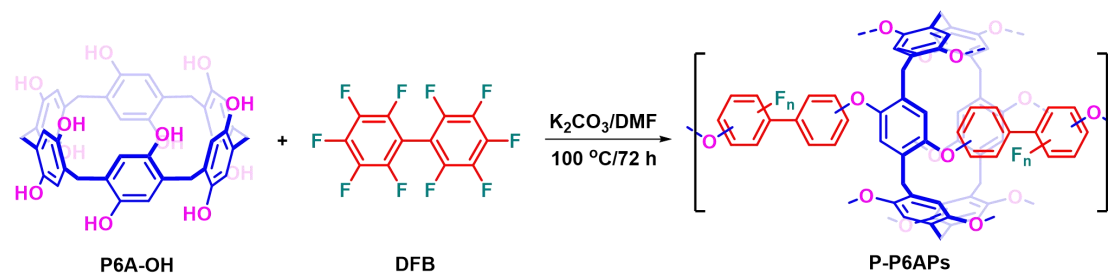

**Syntheses of P-P6APs:** A suspension of P6A-OH (0.50 g, 0.68 mmol), decafluorobiphenyl (0.27 g, 0.82 mmol) and  $\text{K}_2\text{CO}_3$  (1.69 g, 12.24 mmol) in DMF (25 mL) was heated at 100 °C for 72 h under  $\text{N}_2$ . The precipitate was filtered and washed with 1N HCl (25 mL  $\times$  3),  $\text{H}_2\text{O}$  (25 mL  $\times$  3), MeOH (25 mL  $\times$  3), THF (25 mL  $\times$  3) and DCM (25 mL  $\times$  3). The solid was dried under high vacuum to yield P-P6APs as a black solid.

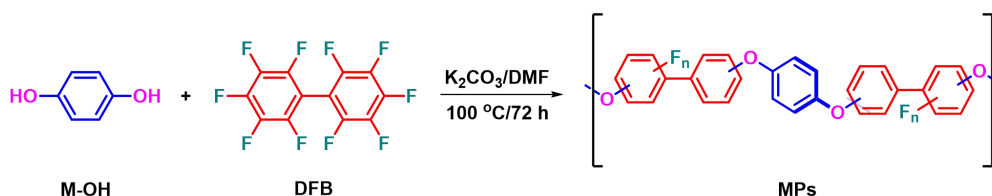

**Syntheses of MPs:** A suspension of M-OH (4.01 g, 36.33 mmol), decafluorobiphenyl (2.20 g, 6.58 mmol) and  $\text{K}_2\text{CO}_3$  (13.00 g, 94.06 mmol) in DMF (150 mL) was heated at 100 °C for 72 h under  $\text{N}_2$ . The precipitate was filtered and washed with 1N HCl (100 mL  $\times$  3),  $\text{H}_2\text{O}$  (100 mL  $\times$  3), MeOH (100 mL  $\times$  3), THF (100 mL  $\times$  3) and DCM (100 mL  $\times$  3). The solid was dried under high vacuum to yield MPs as a white solid.

### 3. Supporting results and experimental raw data

#### 3.1 FT-IR spectra of M-OH and MPs

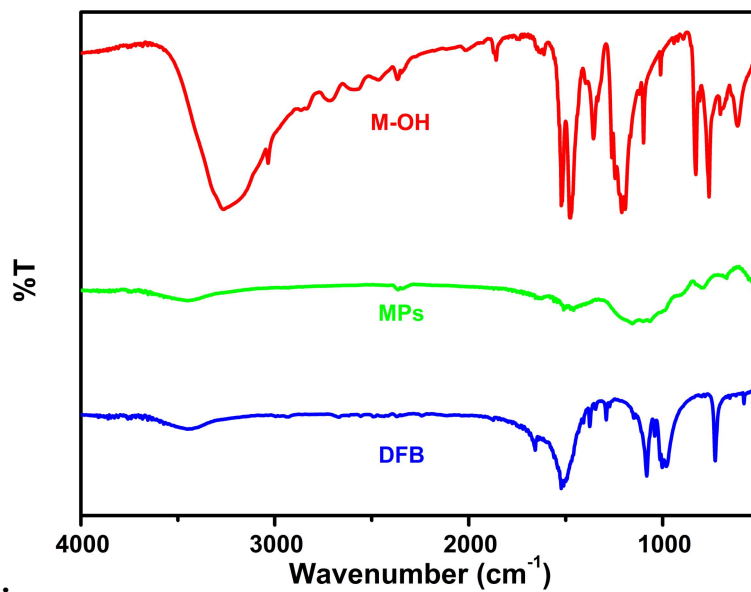

**Fig. S1** FT-IR spectra of M-OH, DFB and MPs.

### 3.2 Gas adsorption and porosity measurements

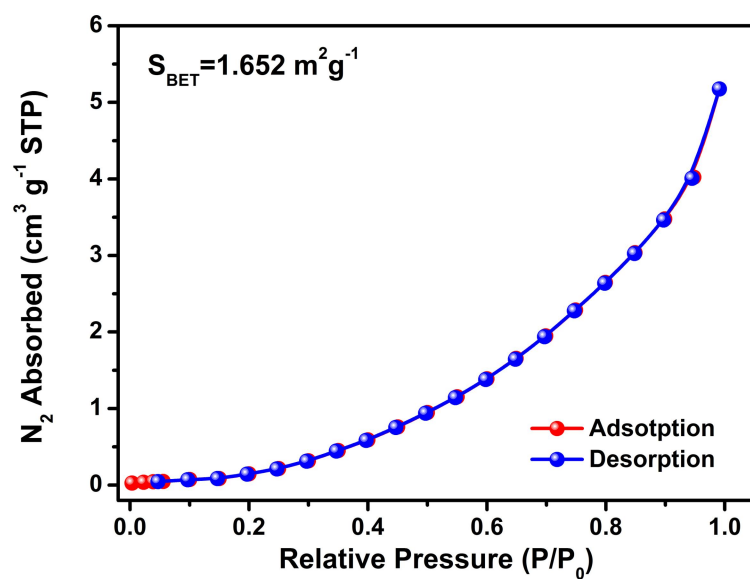

**Fig. S2**  $N_2$  adsorption/desorption isotherm of MPs.

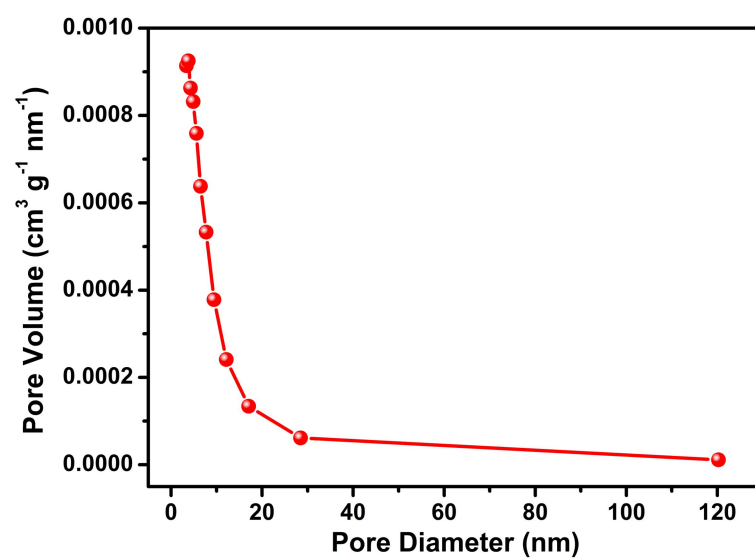

**Fig. S3** The cumulative pore volume (pore diameter) measurement of MPs. The result suggests that MPs is nonporous.

### 3.3 Calibration curve of iodine in aqueous solution for adsorption study

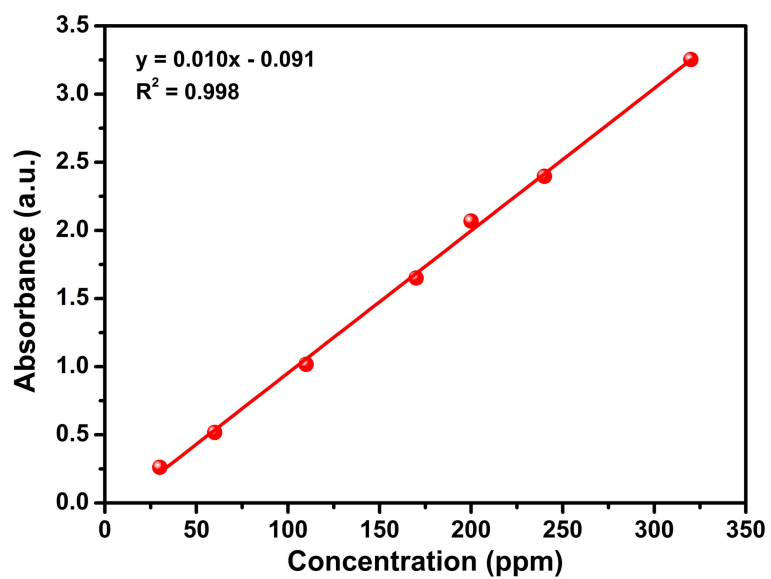

**Fig. S4** Calibration curve obtained by the UV/vis absorption peak at 286 nm and used for calculating the  $I_2/KI_{(aq)}$  concentration in the iodine capture study described in the main text.

### 3.4 Iodine capture speed monitoring in aqueous solution

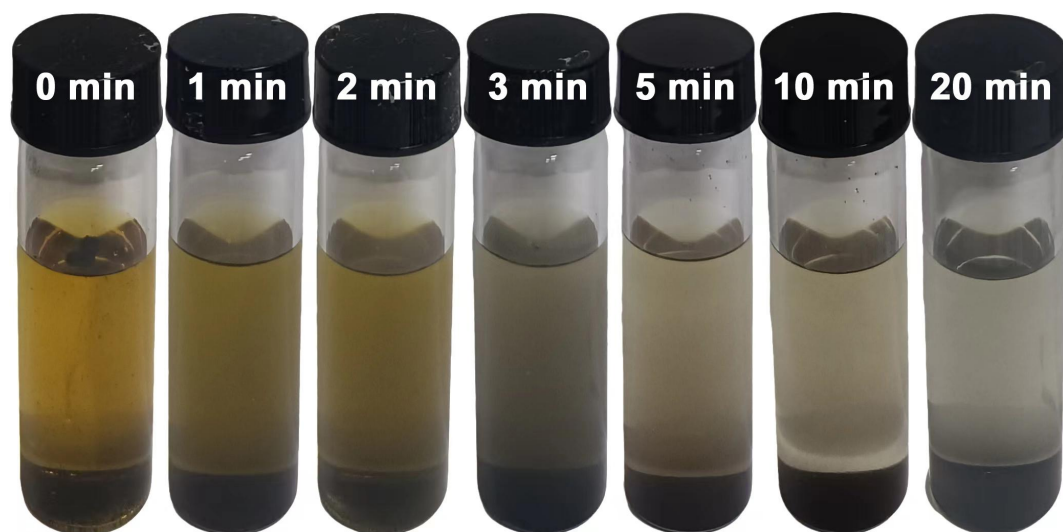

**Fig. S5** Color changes of  $I_2/KI_{(aq)}$  (250 ppm) upon addition of AC (6 mg).

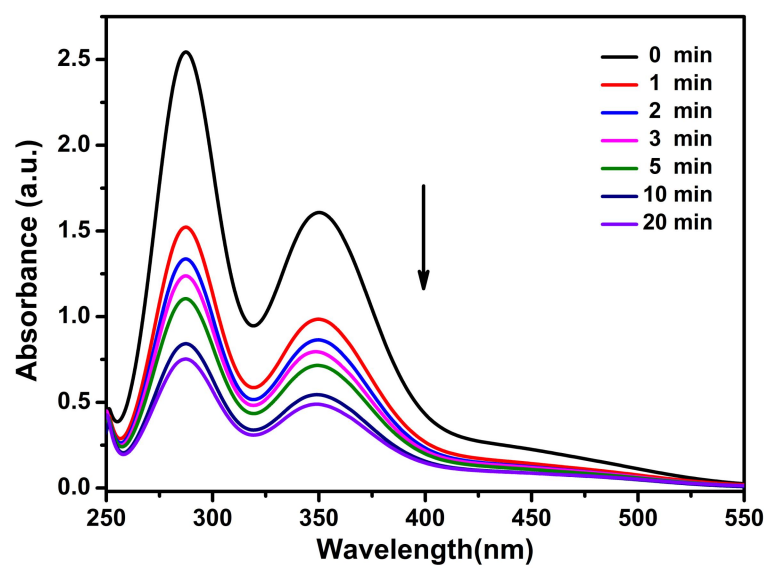

**Fig. S6** Time-dependent UV/vis absorption spectra of  $I_2/KI_{(aq)}$  (250 ppm) upon addition of AC (6.0 mg).

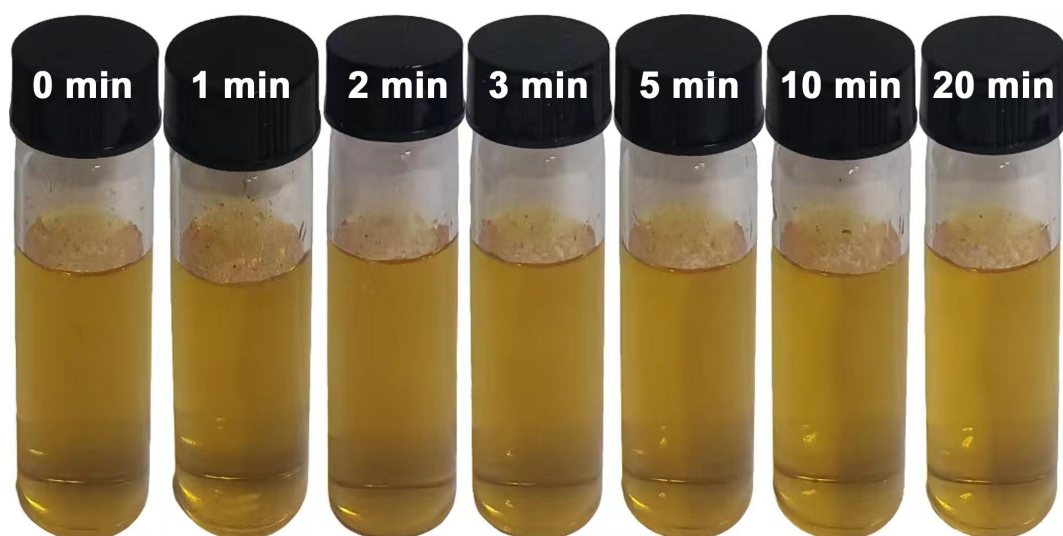

**Fig. S7** Color changes of  $I_2/KI_{(aq)}$  (250 ppm) upon addition of MPs (6 mg).

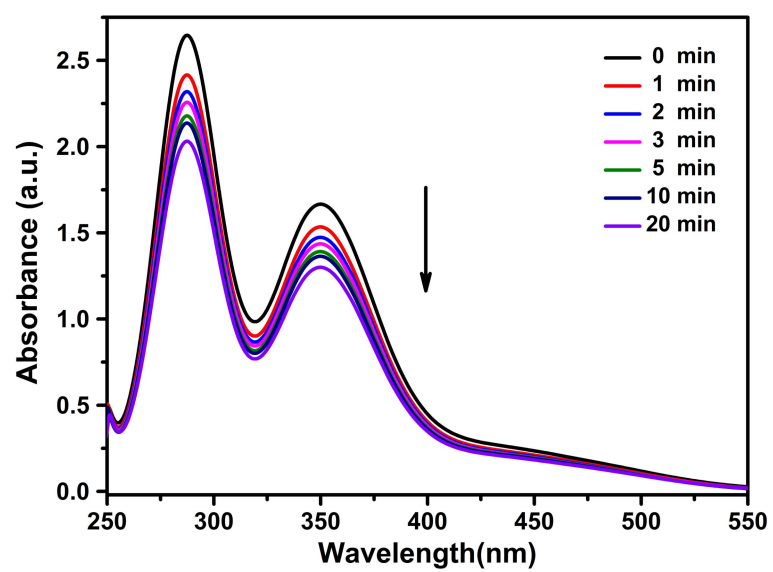

**Fig. S8** Time-dependent UV/vis absorption spectra of  $I_2/KI_{(aq)}$  (250 ppm) upon addition of MPs (6.0 mg).

### 3.5 Selective adsorption experiments

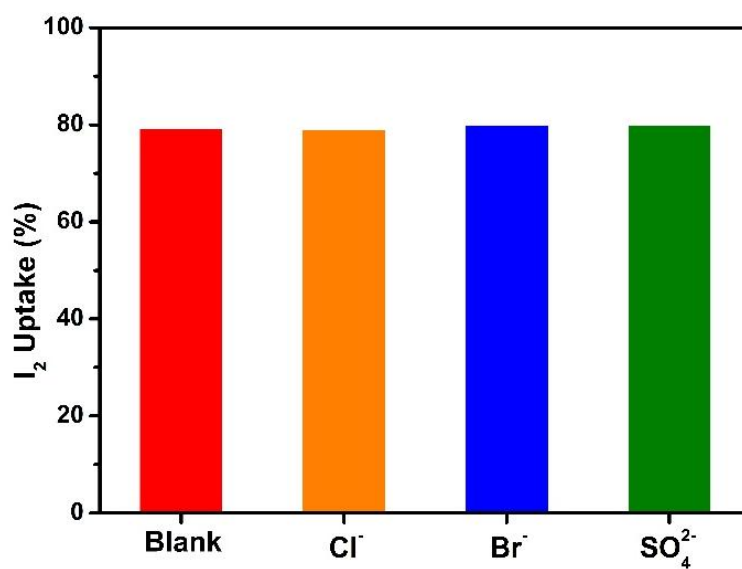

**Fig. S9** Uptake efficiencies of P-P6APs for saturated iodine aqueous solution (250 ppm) in the presence of competing anions (as their potassium salts).

### 3.6 Comparison of adsorption capacity

**Table S1** Iodine uptake capacities of different macrocycle-based crosslinked polymers from aqueous phase.

| Adsorbents     | $S_{\text{BET}}$<br>( $\text{m}^2\cdot\text{g}^{-1}$ ) | Conditions<br>(P: $\text{I}_2$ , S: adsorbent)      | Adsorption<br>amount (g/g) | Ref. |
|----------------|--------------------------------------------------------|-----------------------------------------------------|----------------------------|------|
| P-P6APs        | 366.09                                                 | P=250 ppm, S=1 $\text{mg mL}^{-1}$                  | 0.2                        | Here |
| C[4]P-TEPM     | 138.4                                                  | P=1.2 mM, S=1 $\text{mg mL}^{-1}$                   | 0.29                       | [2]  |
| C[4]P-HEPM     | 277.6                                                  | P=1.2 mM, S=1 $\text{mg mL}^{-1}$                   | 0.30                       | [2]  |
| CMP-4          | 9.5                                                    | P=1 mM                                              | /                          | [3]  |
| C[4]P-BTP      | 20.5                                                   | P=1.2 mM, S=1 $\text{mg mL}^{-1}$                   | 0.30                       | [4]  |
| C[4]P-DPP      | 110.0                                                  | P=1.2 mM, S=1 $\text{mg mL}^{-1}$                   | 0.14                       | [4]  |
| CaCOP1         | 10.86                                                  | P=100,000 ppm, S=17 $\text{mg mL}^{-1}$             | 2.40                       | [5]  |
| CaCOP2         | 20.16                                                  | P=100,000 ppm, S=17 $\text{mg mL}^{-1}$             | 2.81                       | [5]  |
| CaCOP3         | 81.09                                                  | P=100,000 ppm, S=17 $\text{mg mL}^{-1}$             | 3.1                        | [5]  |
| DTTP5          | 14.9                                                   | P=0.1 $\text{mg mL}^{-1}$ , S=1 $\text{mg mL}^{-1}$ | 0.09                       | [6]  |
| $\Delta$ @PPG3 | 0.0006                                                 | P=0.3 mM, S=2 $\text{mg mL}^{-1}$                   | 0.035                      | [7]  |
| $\Delta$ @PPG6 | 0.0097                                                 | P=0.3 mM, S=2 $\text{mg mL}^{-1}$                   | 0.035                      | [7]  |

### 3.7 Calibration curve of iodine in n-hexane for adsorption study

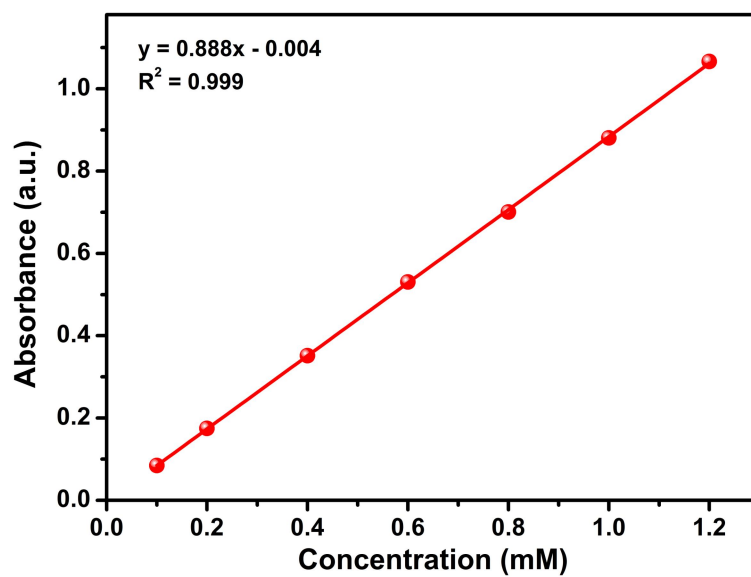

**Fig. S10** Calibration curve obtained by the UV/vis absorption peak at 520 nm and used for calculating the iodine/n-hexane solution concentration in the iodine capture study described in the main text.

### 3.8 Iodine capture speed monitoring in n-hexane

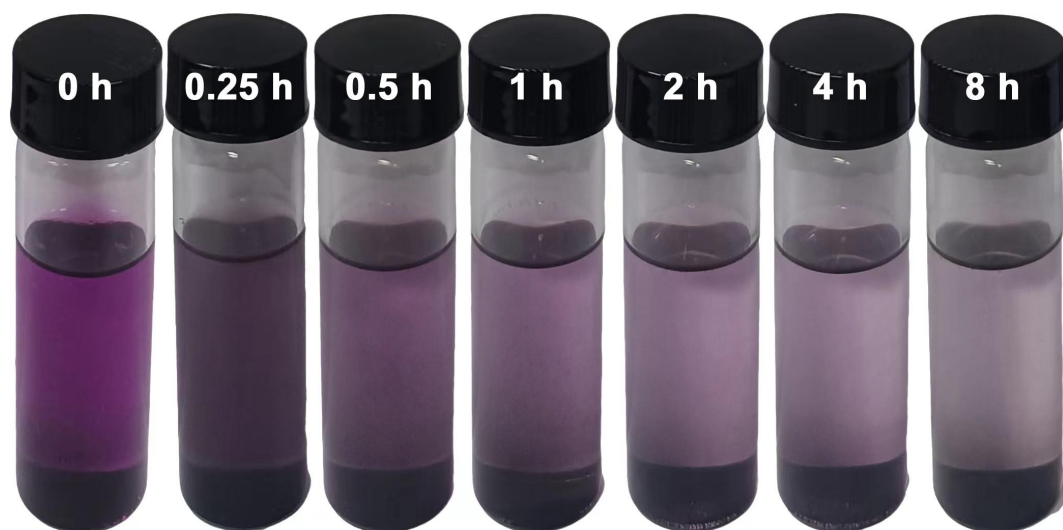

**Fig. S11** Color changes of  $I_2$  (1 mM) in n-hexane upon addition of AC (24 mg).

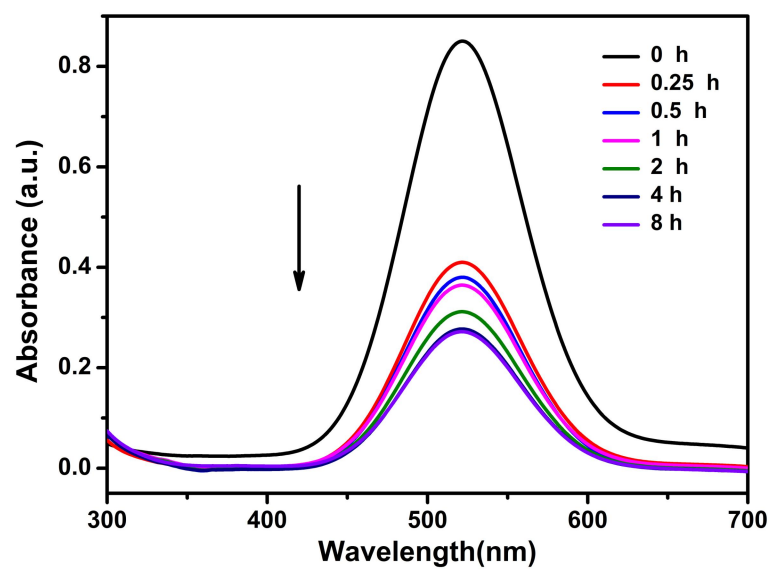

**Fig. S12** Time-dependent UV/vis absorption spectra of iodine/n-hexane solution (1 mM) upon addition of AC (24.0 mg).

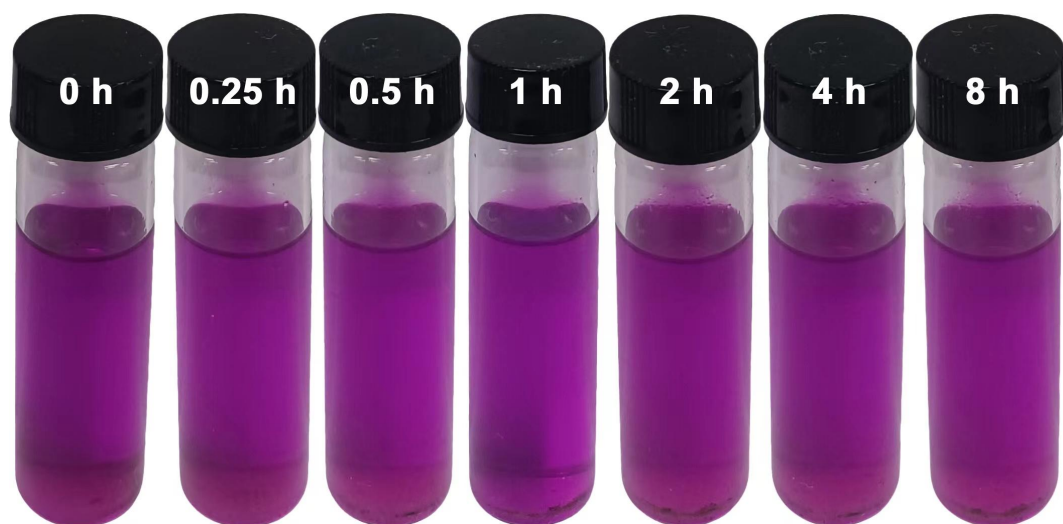

**Fig. S13** Color changes of I<sub>2</sub> (1 mM) in n-hexane upon addition of MPs (24 mg).

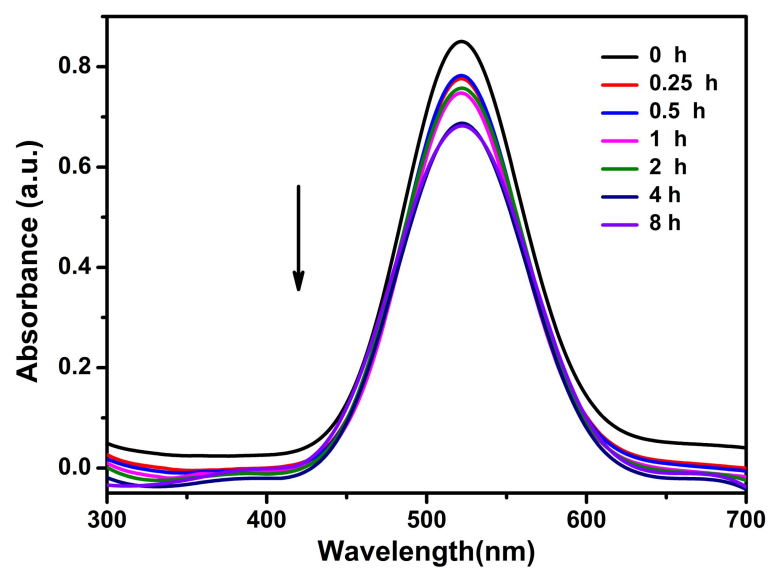

**Fig. S14** Time-dependent UV/vis absorption spectra of iodine/n-hexane solution (1 mM) upon addition of MPs (24.0 mg).

### 3.9 PXRD patterns of iodine and I<sub>2</sub>@P-P6APs

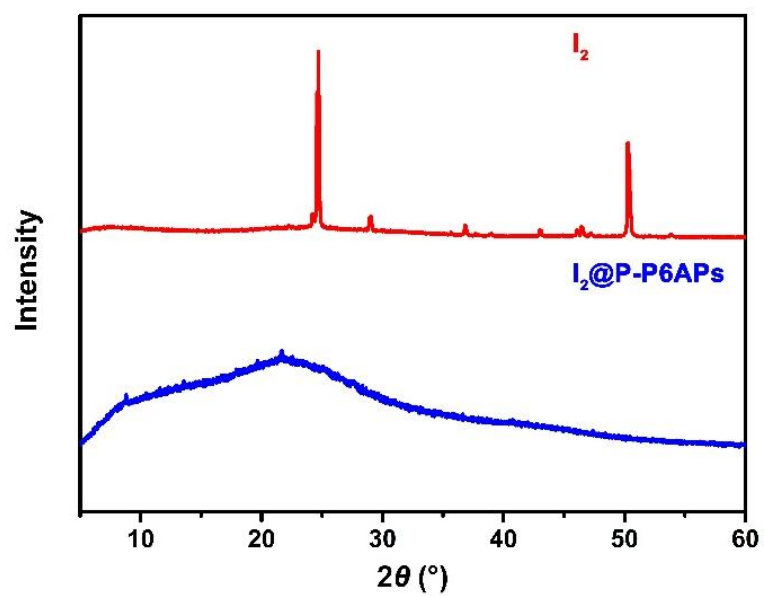

**Fig. S15** PXRD patterns of iodine and I<sub>2</sub>@P-P6APs.

### 3.10 FT-IR spectra of P-P6APs and I<sub>2</sub>@P-P6APs

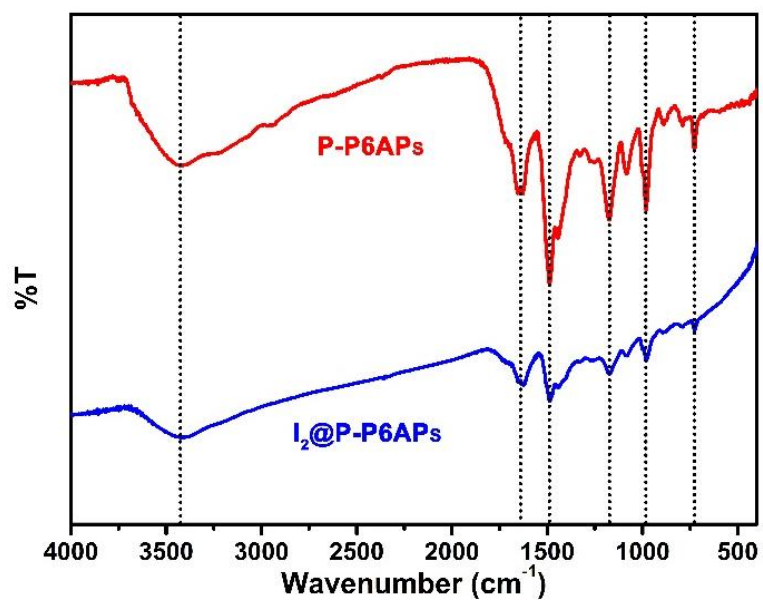

**Fig. S16** FT-IR spectra of P-P6APs and I<sub>2</sub>@P-P6APs.

### 3.11 The sixth recycling experiments

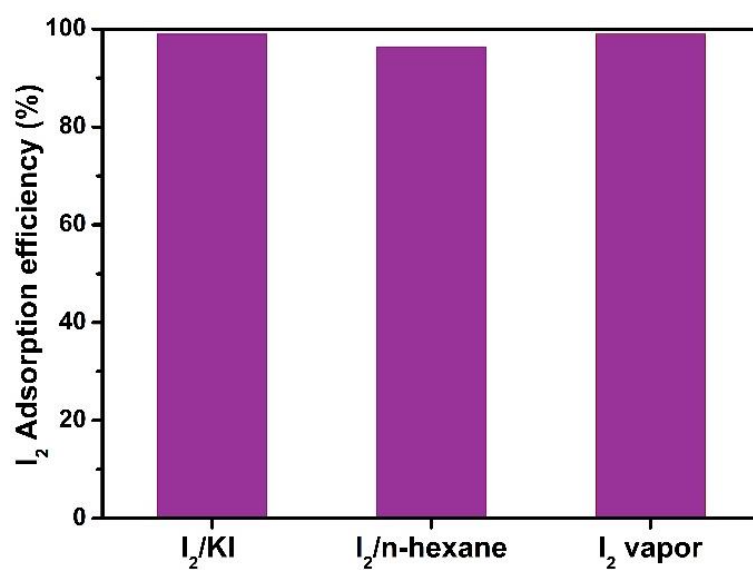

**Fig. S17** Iodine adsorption efficiency of P-P6APs after 5 cycles of reuse.

## References

1. Y. Ma, X. Chi, X. Yan, J. Liu, Y. Yao, W. Chen, F. Huang and J.-L. Hou, per-Hydroxylated Pillar[6]arene: Synthesis, X-ray Crystal Structure, and HostGuest Complexation, *Org. Lett.*, 2012, **14**, 1532-1535.
2. Z. Zheng, Q. Lin, L. Xie, X. Chen, H. Zhou, K. Lin, D. Zhang, X. Chi, J. L. Sessler and H. Wang, Macrocyclic polymeric networks based on a chair-like calix[4]pyrrole for the rapid and efficient adsorption of iodine from water, *J. Mater. Chem. A*, 2023, **11**, 13399.
3. D. Dai, J. Yang, Y.-C. Zou, J.-R. Wu, L.-L. Tan, Y. Wang, B. Li, T. Lu, B. Wang and Y.-W. Yang, Macrocyclic Arenes-Based Conjugated Macrocyclic Polymers for Highly Selective CO<sub>2</sub> Capture and Iodine Adsorption, *Angew. Chem. Int. Ed.*, 2021, **60**, 8967-8975.
4. L. Xie, Z. Zheng, Q. Lin, H. Zhou, X. Ji, J. L. Sessler and H. Wang, Calix[4]pyrrole-based Crosslinked Polymer Networks for Highly Effective Iodine Adsorption from Water, *Angew. Chem. Int. Ed.*, 2022, **61**, e202113724.
5. D. An, L. Li, Z. Zhang, A. M. Asiri, K. A. Alamry and X. Zhang, Amino-bridged covalent organic Polycalix[4]arenes for ultra efficient adsorption of iodine in water, *Mater. Chem. Phys.*, 2020, **239**, 122328.
6. J. Cao, H. Zhu, L. Shangguan, Y. Liu, P. Liu, Q. Li, Y. Wu and F. Huang, A pillar[5]arene-based 3D polymer network for efficient iodine capture in aqueous solution, *Polym. Chem.*, 2021, **12**, 3517.
7. B. T. Benkhaled, A. Chaix, C. Gomri, S. Buys, N. Namar, N. Sehoulia, R. Jadhav, J. Richard, L. Lichon, C. Nguyen, M. Gary-Bobo and M. Semsarilar, Novel Biocompatible Trianglamine Networks for Efficient Iodine Capture, *ACS Appl. Mater. Interfaces*, 2023, **15**, 42942-42953.
